# Supplementary material
Source: Springer Nature journal article supplement (https://www.springermedizin.de/resource/supplementary/12891_2013_2177_MOESM1_ESM.pdf/9509610)
Supplement: MOESM1 [file 9509610]

**Coping Strategies, Getting on with it, Acceptance, Other shoulder, Analgesia, aids and adaptations,**

**Impact upon ADL, Leisure, Occupation, Emotional impact, Finance, Social support**

**Limited movement  
Reduced strength  
Audible Sounds**

**Broken sleep,  
waking, night pain,  
daytime tiredness  
and irritability**

**Intense  
shocking  
surprising  
pain**
